# Supplementary material for: A Gatekeeper Chaperone Complex Directs Translocator Secretion during Type Three Secretion
Source: PubMed Central journal article supplement (PMC4222845; doi:10.1371/journal.ppat.1004498), 2014-11-06
Supplement: ppat.1004498.s002.pdf [file ppat.1004498.s002.pdf]

*CopN Chlamydia*

1 10 20 30 40 50 60 70  
*CopN Chlamydia* MAASGGTGGGLGGTQGVNLAAVEAAAAKADAAEVVASQESEMNMIIQSQDLTNPAAATRKKKEKFKQTL  
*MxiC Shigella* .MLDVKNTGVFSSAFIDKLNAMTNSDDGDETADAELDSGLANS.....KYIDSSDEMALSLSFI...  
*InvE Salmonella* .MTPGTSISGSRILSRQTSHQDATQHTDAQQAEIQQAEDSSPGAEVQKFGVSTDEMSALAEFR...  
*PopN Bordetella* . . . . .MTRIDAAPNPFAAMQGRHDASANTSSGWLQGRDIAPAP.TGISLADAAEELSALHMAQAAEEK  
*YopN/TyeA Yersinia* . . . . .MTTLHNISYGNTPLRNEHPETASSQIVNQTL.GQFRGESVQIVSGTLQSLADAAEEVTVVFSERKEL  
*PopN/Pcr1 Pseudomonas* . . . . .MDILO...SSAAPLA...PREAANPAQOAG.GSFGGERVHVVS.VSQSLADAAEELTFAFSERAEEK.  
*hypoth./VP1666 Vibrio* . . . . .MSIINSQIATNTKFDASVRNGLESSRADSAVKGSYRGETVVRVHN.ATQSLFDAMEELTSLGSEKAEK.

*CopN Chlamydia*

80 90 100 110 120 130 140  
*CopN Chlamydia* ESRKKGEGAKAEKKESETEKPKDLDLADKYASGNSEISGQELRGLRDAIGDDASPEDLLALVQEKIKDPA  
*MxiC Shigella* . . . . .NRRLLEKRLKGTNSDSERILID.....GEEDEINHKIFDKLKRTLKDNLLPDRDFIDRLKRYFKDPS  
*InvE Salmonella* . . . . .RRDYEEKSSNSLSNFERVLE.....DEALPKANITLKLISVHGAL...EDFLRQARSLRFPDPS  
*PopN Bordetella* HHSEKRVTAERFPMLWLDAAQLAELFSSHDPDAQAKLEALTAELLRGRGAPMQLAAQAFPG...VTVQY  
*YopN/TyeA Yersinia* SLDKRKLSDSQARVSDVEEQVNQYLSKVPLEEQKQNVSELSSLNSPNISLSQLKAYLEKGSSEEPSQF  
*PopN/Pcr1 Pseudomonas* SLAKRRLSDAHRLESVEVQAMLOEYWKRIIPDLEQQKLEALIAHLGSGQLSSLAQLSAYLEGFSSAISQRF  
*hypoth./VP1666 Vibrio* DLTKRKIKDGGVVRVNEAEELVSDYLRKVPDLKQKIKIDLAAKAMAGNISTIAQLQAYLNGFSEEKSHQY

*CopN Chlamydia*

150 160 170 180 190 200  
*CopN Chlamydia* LQSTALDYLVQTPPSQKLEKQELIQARNTHTEQFG...RTAIGAKNIIIFASQEYADQLNVKPSGLRSLDY  
*MxiC Shigella* DQVLALELLEKDKDLTAEQVELLTKIINEIISGSE...KSVNAGINSIAIQAKLFG.NKMLKLEPQLLRACY  
*InvE Salmonella* DLVLVRLRELLRRLKDLLEE.IVRRKLESLKHHVEEQTDP.RTKLAGINICALKARLFG.KTLSLKPGLLRASVY  
*PopN Bordetella* LALQALQRGDHGEDAAP.HALEALRDALADLELAHG..PEITRAGINTLPTAGAF..RSADELAGFQHAAY  
*YopN/TyeA Yersinia* KMLCGLRDALGHRPELA.HLSHLVQALVSMAEEOG..EATVLGARITPEAYRES.QSSVNPLOPLRDTYV  
*PopN/Pcr1 Pseudomonas* LALSRLARDVLAGRPEAR.AMLALVDQALLRMADEEQG..LEITEGLGRIEPLAAEAS.AAGVGDIAQLRDTYV  
*hypoth./VP1666 Vibrio* LALKAVKKYL SANPESK.HLLALIDQAILKI EQNPDSWSQIDTEIRVSHFADEFSKEQEFSSLHQLRGFV

*CopN Chlamydia*

210 220 230 240 250 260 270  
*CopN Chlamydia* LEVFGDTHTCQQLLSMLQDRYFYQDMAI VSSFLMKGMATELKRQGPYVPSAQLQVLMETERNLQAVLTSY  
*MxiC Shigella* RGFITMGNISTTDQYIEWLGNFGTYNHRHTIVNVFVEQSLIVDMDEKSPCNAYEFGFVLSKLAIKMIRTS.  
*InvE Salmonella* RQFTIQSSESHEVYIADWLASYGYQRRLVLDPIEGSLTDIDANADPSCSRLEFGQLLRRLTQKMLRSA.  
*PopN Bordetella* RDIALGGLSLVARTLDDLVLRYGNDDIHGALGALIQALGHDLAAPTSTDGVRLQGLASLDYQVMAATVYL  
*YopN/TyeA Yersinia* RDAVMGYQGIYA IWSDLQKRFPPNGDIDSVILFLQKALSADLQSQSGSGREKLGIVISDLQKLEKFGSVS  
*PopN/Pcr1 Pseudomonas* RDAVHSDYRGLSAAWQDIQARFAAFLPSTVVAFLQKALSADLQSSRLPDKLERVMSDMKLRVLGGLA  
*hypoth./VP1666 Vibrio* RDTVHSYRGLGSAYQDVVERFGEQVLESTAVDFMLQGMASDLVSGNSIDPSVKLQLLMSDMKLRKLTLLIQ

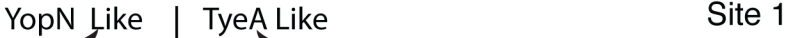

*CopN Chlamydia*

280 290 300 310 320 330 340  
*CopN Chlamydia* DQYFESRVPILLDSLKAEGITQPSDLNFWKVAESYHKIINDKFPPTASKVEREVRNLI.GDDVDSVTVGLNLI  
*MxiC Shigella* D.....VIFMKKLESLSLKDGSLSAEQLLTLLEYIFQVPSSESEQITLVIIEVSR..ASHEDSVVYQI  
*InvE Salmonella* D.....LFLVSTLLSYSLTKAFNAEESWLLMLLQLQPHVEVSLADAIIGNALLLSHKHEASLFTQ  
*PopN Bordetella* EECN...ALKQRLGNASGQE..CADAQGLMRDLVGISDKIAPARFEKLAERHG..ANALSERIAFLGG  
*YopN/TyeA Yersinia* DQVKGFWQFFSEG.ITNIVRPFMAYDLSEFMGDIVALLDKRWAGIHDVLEHLANAFS.LPTPEIKVRFYQD  
*PopN/Pcr1 Pseudomonas* EQVGALWQLVGTGERGHGIRAFMAYGPELMTGAVIALLEKRWVGVVAEQALHLEPLP.LADVARQIHFFRE  
*hypoth./VP1666 Vibrio* DQVGRFLFQMFKPERMSHGLSGFMAYQASDLMADVIALVLEQRWVSSEELWKKIATSME.LVAIEQKIDFFRE

*CopN Chlamydia*

350 360 370 380 390  
*CopN Chlamydia* FFSALRQTSRSLFSSADKROQLGAMIANALDAVNINNEDYPKASDFPKPYPSWS  
*MxiC Shigella* YLSVFNESPHDFKSESEREITAINILRELVTSAYKKEELSR.....  
*InvE Salmonella* FYVCKAIPSSLFYFSEYWEELMALRSMTDSPYKHEMAEQRRRTIEKPS.....  
*PopN Bordetella* VRRLKLDLPTQIYADMVRAITVLAQAQDALDNAIAMENA.....  
*YopN/TyeA Yersinia* LKRMFLRLPLGVFSSDEEQRNLNMQCAIDMAIESEEBEL...SELD.....  
*PopN/Pcr1 Pseudomonas* LKRLYRLLPVEVFGDDEQRNLLNACQMALDLAIEREEEQQ..HGLG.....  
*hypoth./VP1666 Vibrio* LHKLIRHIVPVVFADEQRONLIQAAQKALDPAIDLEEEFEAWDDEL.....

Site 2
